# Supplementary material for: Donor-Acceptor Copolymers with 9-(2-Ethylhexyl)carbazole or Dibenzothiophene-5,5-dioxide Donor Units and 5,6-Difluorobenzo[c][1,2,5]thiadiazole Acceptor Units for Photonics
Source: MDPI journal article supplement (doi:10.3390/nano13222939), 2023-11-13
Supplement: s1 [file s1]

## **Supplementary Materials**

### **Donor-Acceptor Copolymers with 9-(2-Ethylhexyl)carbazole or Dibenzothiophene-5,5-dioxide Donor Units and 5,6-Difluorobenzo[*c*][1,2,5]thiadiazole Acceptor Units for Photonics**

**Věra Cimrová\*, Petra Babičová, Mariem Guesmi and Drahomír Výprachtický**

Institute of Macromolecular Chemistry, Czech Academy of Sciences, Heyrovského nám. 2,  
162 00 Prague 6, Czech Republic

\*Correspondence: [cimrova@imc.cas.cz](mailto:cimrova@imc.cas.cz)

## Content

|                                                                                                                           | Page |
|---------------------------------------------------------------------------------------------------------------------------|------|
| Figure S1: $^1\text{H}$ NMR spectrum of copolymer CP1-a (spectra of CP1-a, CP1-b, and CP1-c were found to be similar).    | 3    |
| Figure S2: $^{13}\text{C}$ NMR spectrum of copolymer CP1-a (spectra of CP1-a, CP1-b, and CP1-c were found to be similar). | 3    |
| Figure S3: $^1\text{H}$ NMR spectrum of copolymer CP2.                                                                    | 4    |
| Figure S4: $^{13}\text{C}$ NMR spectrum of copolymer CP2.                                                                 | 4    |

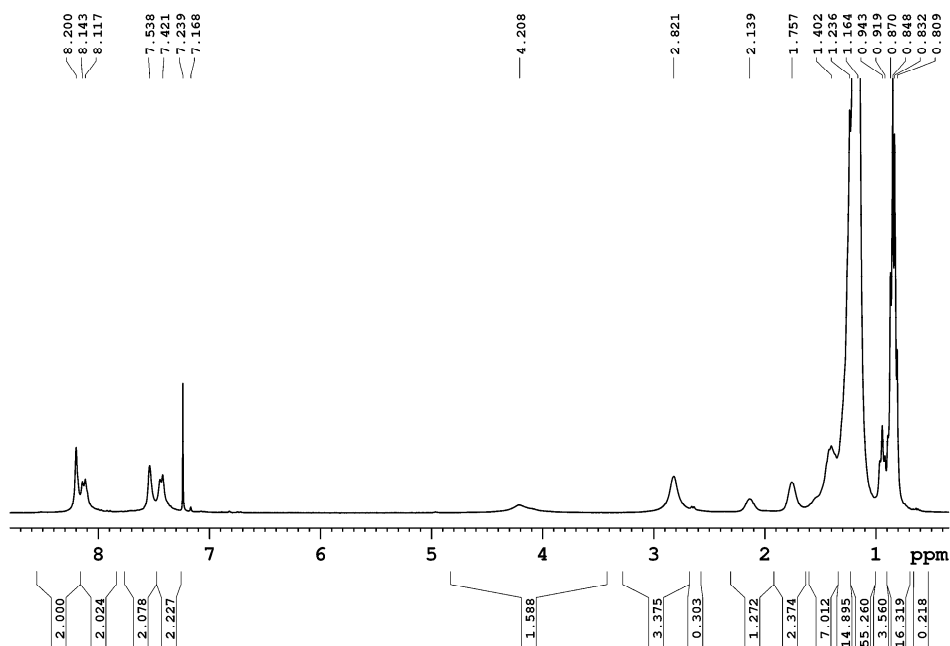

Figure S1.  $^1\text{H}$  NMR spectrum of copolymer CP1-a (spectra of CP1-a, CP1-b, and CP1-c were found to be similar).

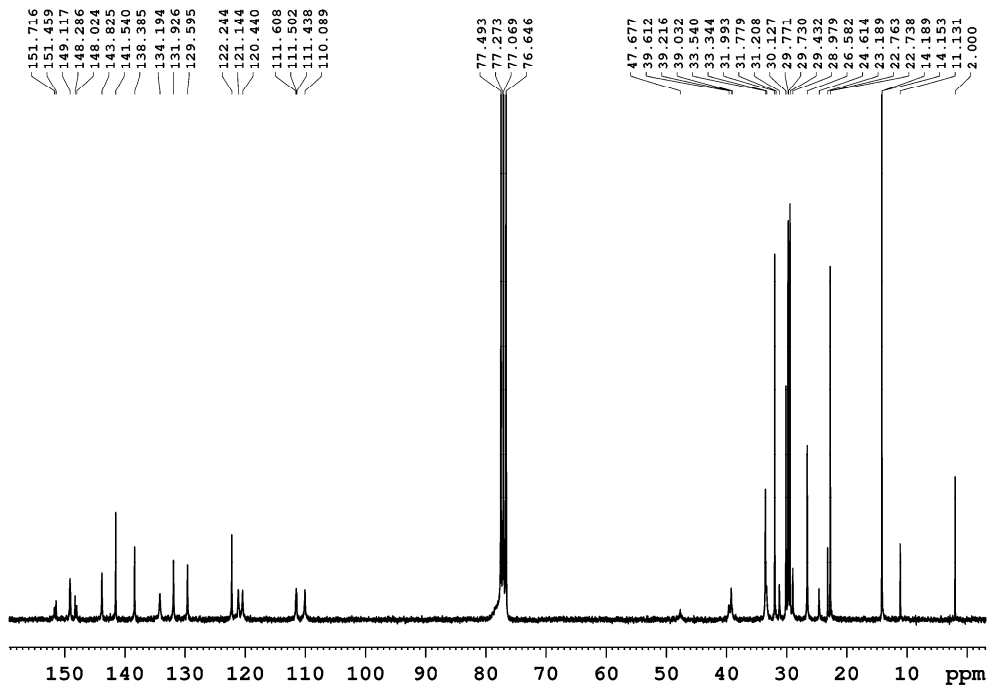

Figure S2.  $^{13}\text{C}$  NMR spectrum of copolymer CP1-a (spectra of CP1-a, CP1-b, and CP1-c were found to be similar).

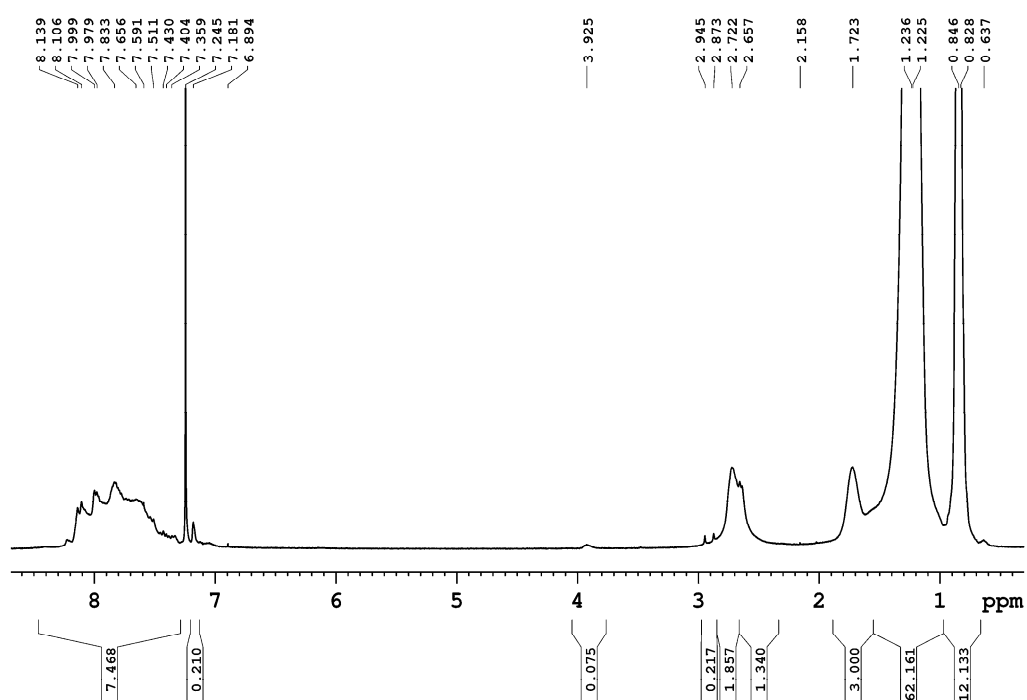

Figure S3. <sup>1</sup>H NMR spectrum of copolymer CP2.

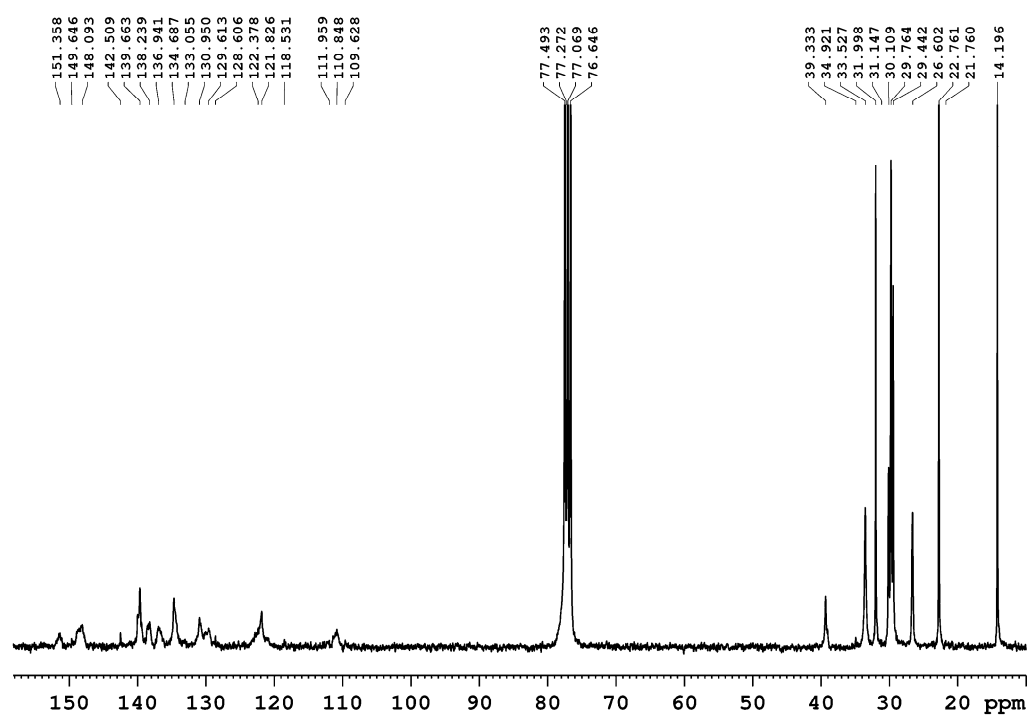

Figure S4. <sup>13</sup>C NMR spectrum of copolymer CP2.
